# Supplementary material
Source: publisher figshare collection journal article supplement (https://frontiersin.figshare.com/ndownloader/files/28527153)

**Harvest Date  
(Julian days)**

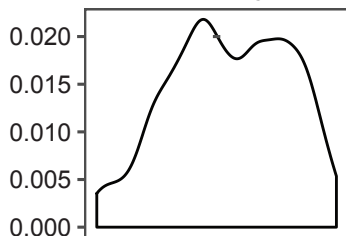

**Firmness at Harvest  
(kg/cm<sup>2</sup>)**

$R^2 = 0.25$   
 $p < 1 \times 10^{-15}$

**Firmness after Storage  
(kg/cm<sup>2</sup>)**

$R^2 = 0.24$   
 $p < 1 \times 10^{-15}$

**Softening (%)**

$R^2 = 0.086$   
 $p = 4.53 \times 10^{-12}$

**Harvest Date  
(Julian days)**

**Firmness at  
Harvest (kg/cm<sup>2</sup>)**

**Firmness after  
Storage (kg/cm<sup>2</sup>)**

**Softening (%)**

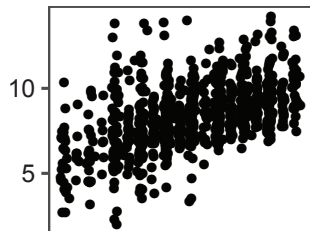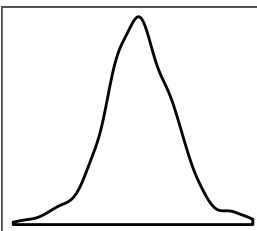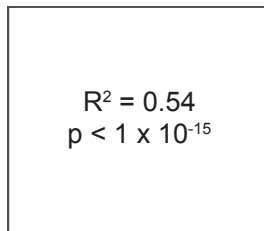

$R^2 = 0.54$   
 $p < 1 \times 10^{-15}$

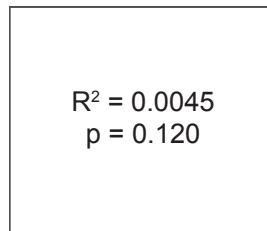

$R^2 = 0.0045$   
 $p = 0.120$

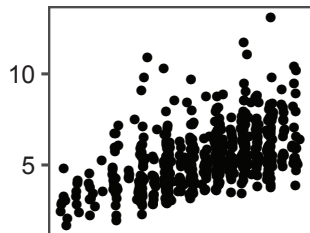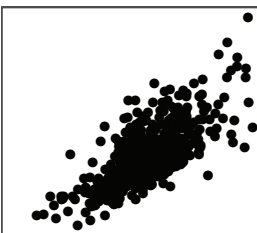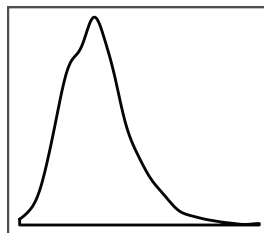

$R^2 = 0.51$   
 $p < 1 \times 10^{-15}$

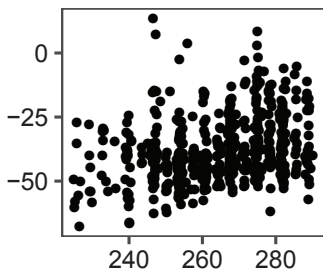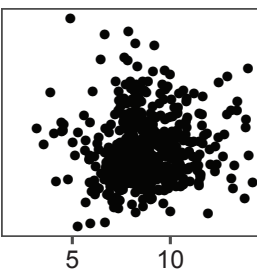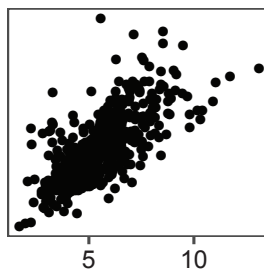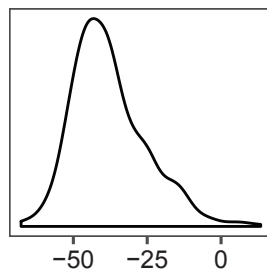

Supplement: Supplementary file 7 [file 28527153]
