# Supplementary material
Source: publisher figshare collection journal article supplement (https://frontiersin.figshare.com/ndownloader/files/28527153)

## Factors / Genetic markers

Harvest date    *ACO1*    *ACS1*    *PG1*    *NAC18.1*

|                        |        |       |       |       |       |
|------------------------|--------|-------|-------|-------|-------|
| Firmness at harvest    | 10.87% | 1.31% |       | 0.76% | 2.64% |
| Firmness after storage | 14.64% |       | 1.15% | 6.64% |       |
| Softening              | 7.24%  |       | 1.85% | 7.51% | 1.57% |

% variance explained

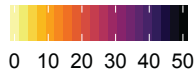

Supplement: Supplementary file 8 [file 28527153]
