# Supplementary material
Source: publisher figshare collection journal article supplement (https://frontiersin.figshare.com/ndownloader/files/28527153)

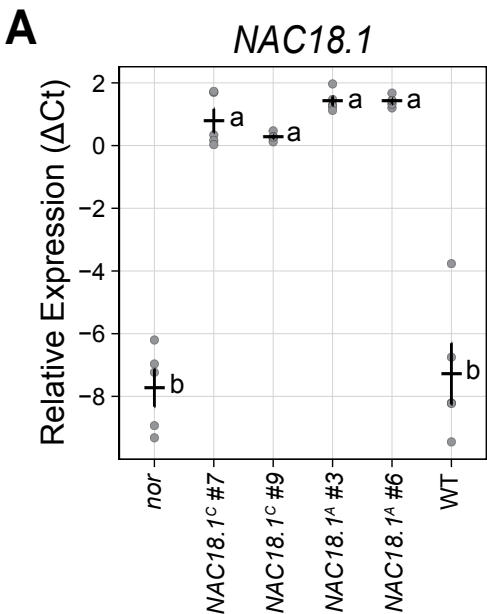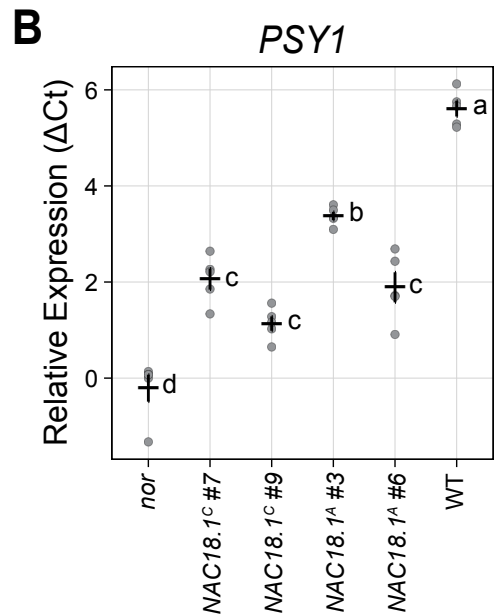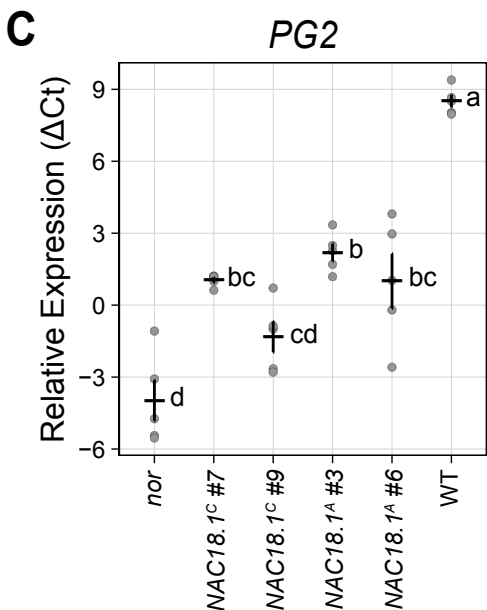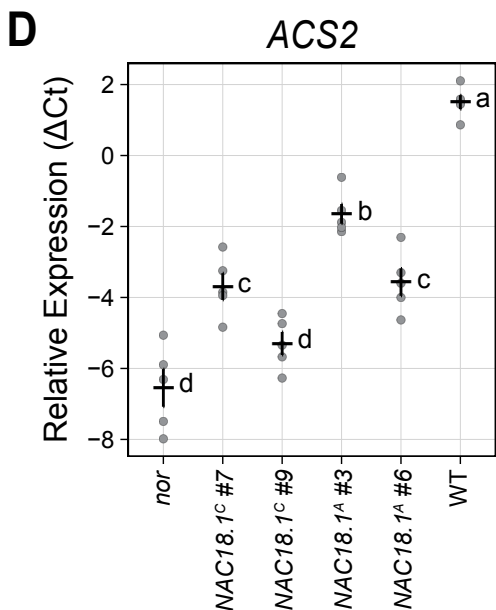

Supplement: Supplementary file 1 [file 28527153]

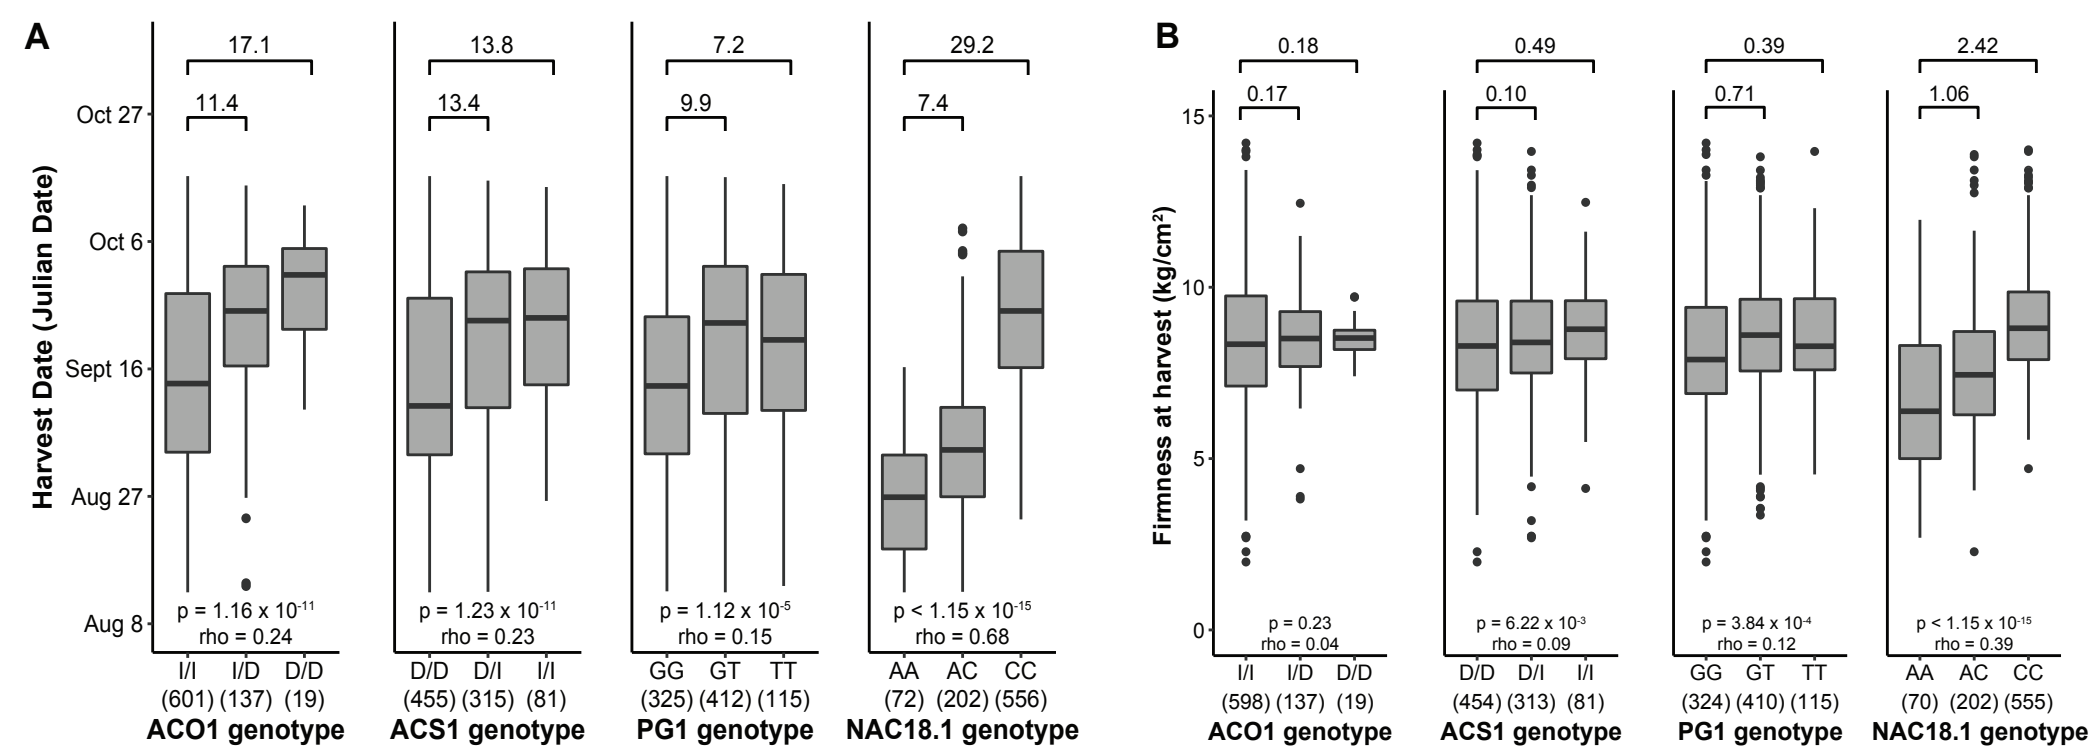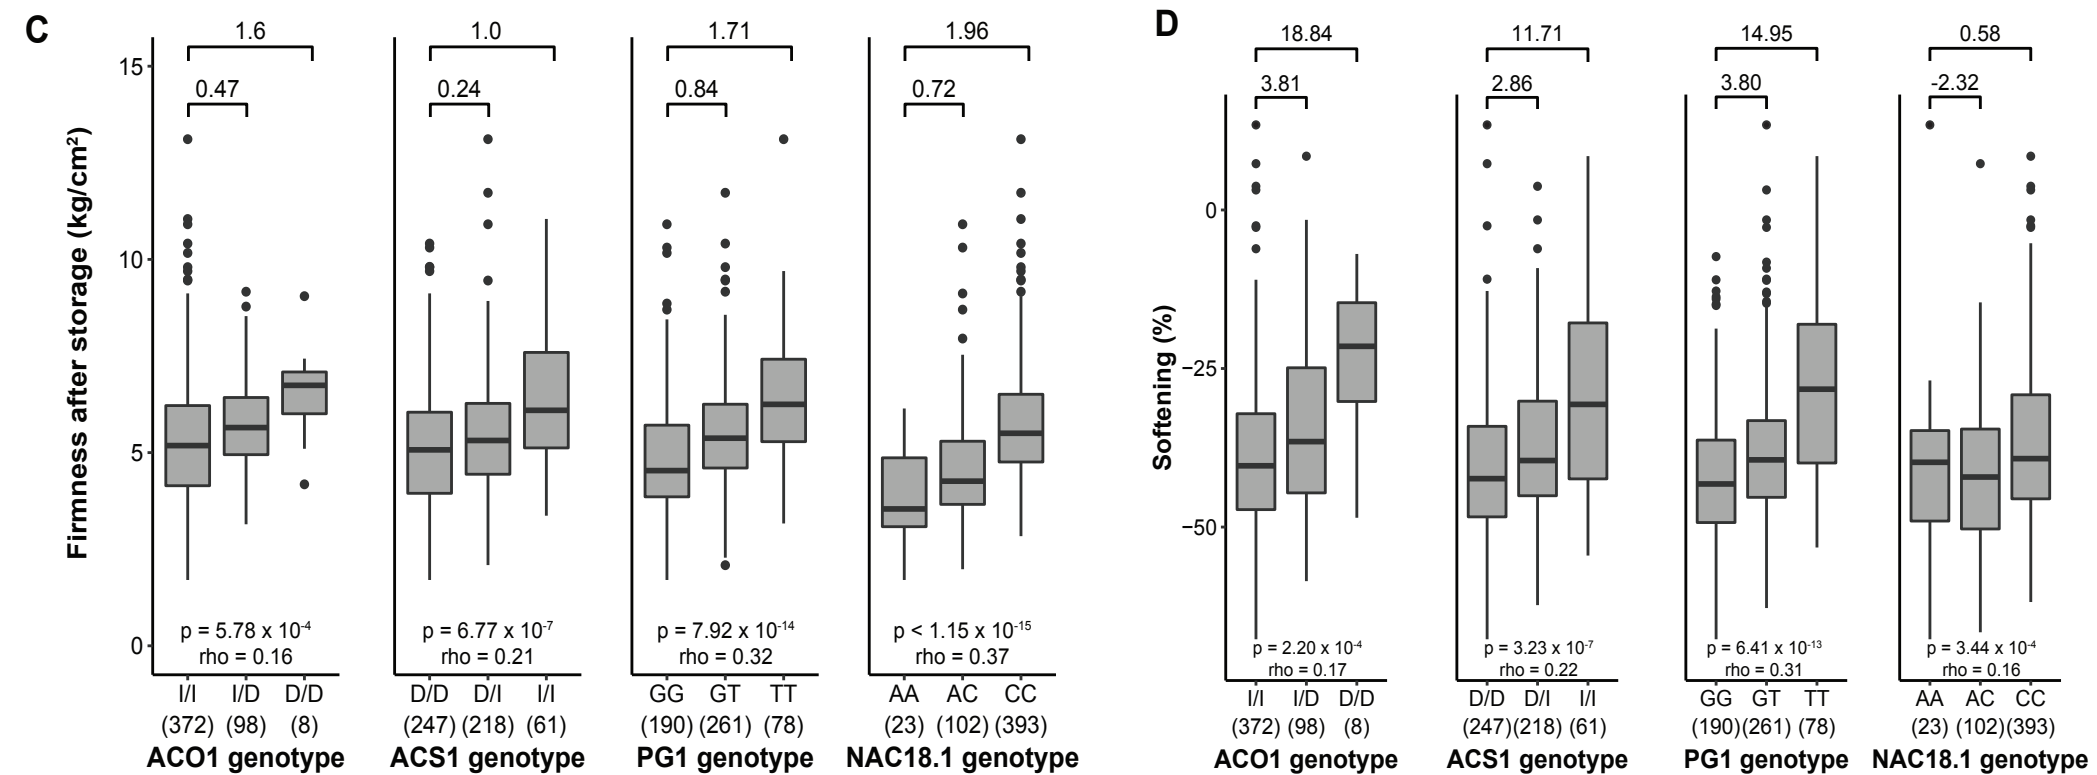

Supplement: Supplementary file 5 [file 28527153]

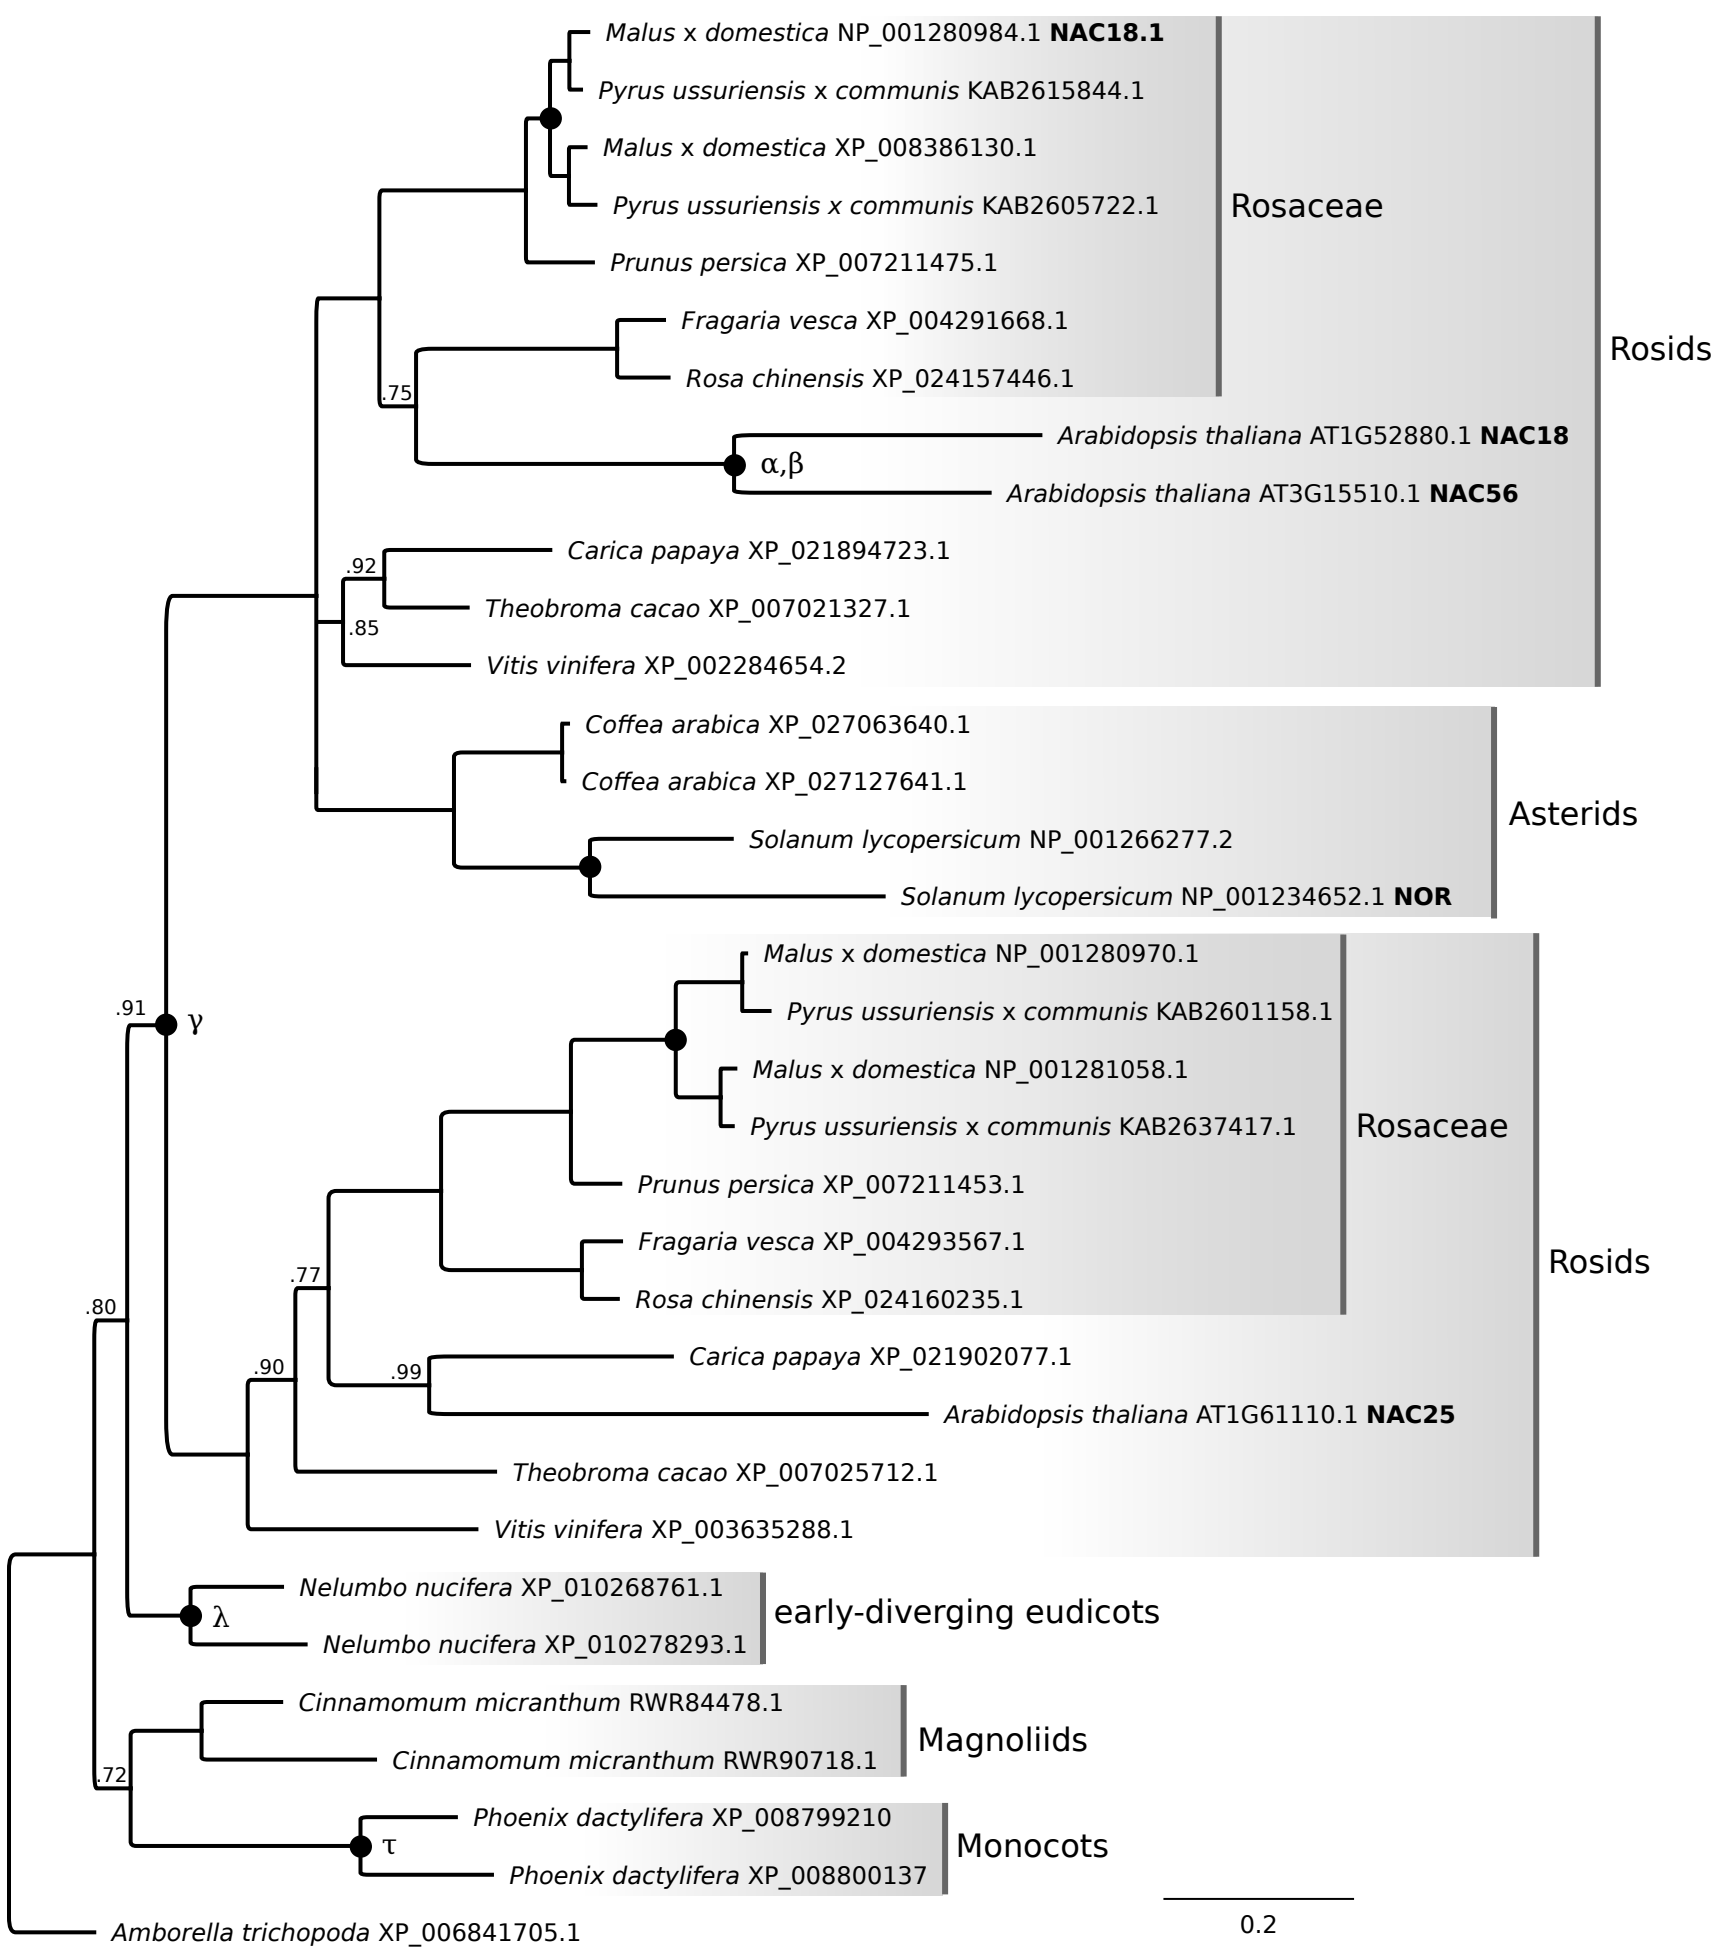

Supplement: Supplementary file 6 [file 28527153]

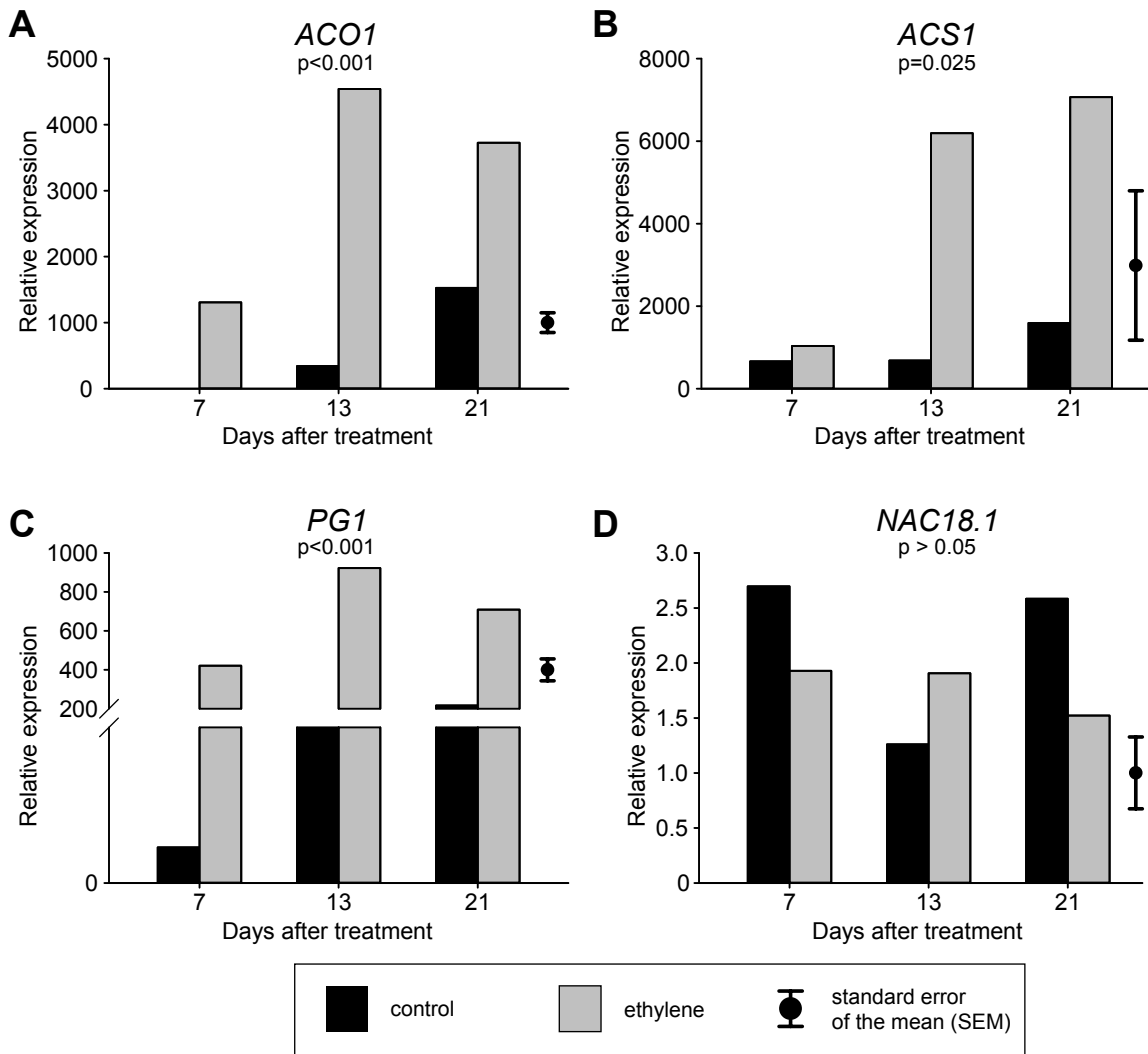

Supplement: Supplementary file 9 [file 28527153]

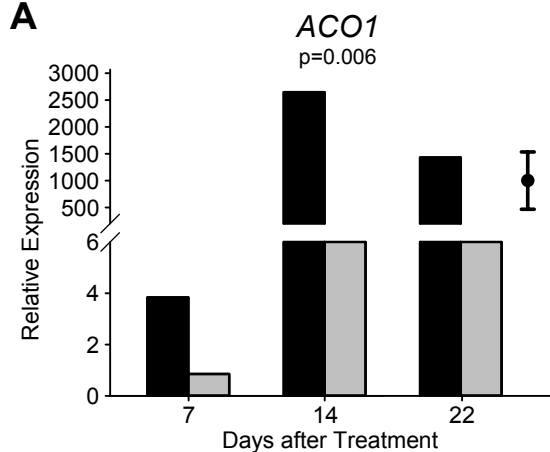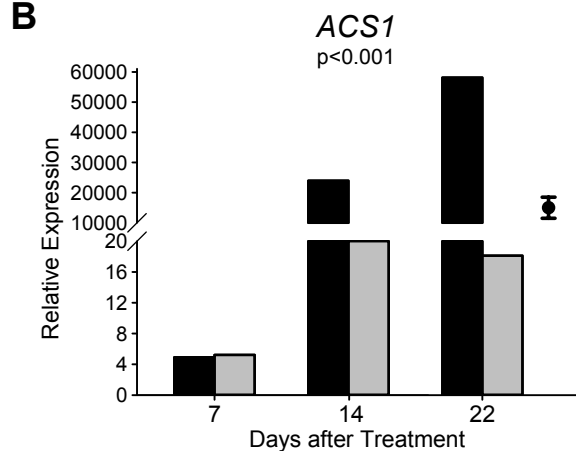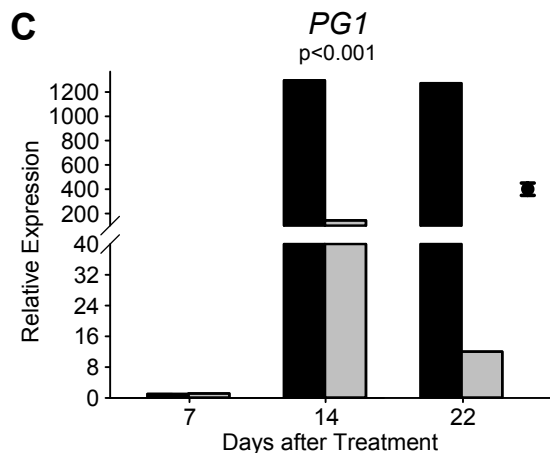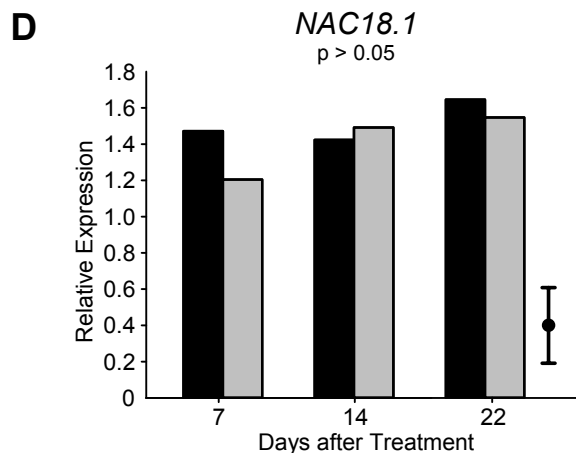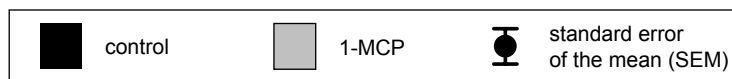

Supplement: Supplementary file 11 [file 28527153]
